# Supplementary material for: A New Class of Reference Material: Additivly Manufactured Monodisperse Number Accurate Microplastic Reference Material through Microextrusion
Source: Research Square preprint supplement (doi:10.21203/rs.3.rs-6411430/v1), 2025-05-06

**A New Class of Reference Material: Additivly Manufactured Monodisperse Number Accurate Microplastic Reference Material through Microextrusion**

**Maurice Hauffea, Lucas Kurzwegb, Robert Möhna, Tilmann Priebeb, Thomas Himmera, Kathrin Harreb***

a Faculty of Mechanical Engineering, University of Applied Sciences Dresden, Friedrich-List-Platz 1, 01069 Dresden, Germany

b Faculty of Agriculture, Environment and Chemistry, University of Applied Sciences Dresden, Friedrich-List-Platz 1, 01069 Dresden, Germany

*** Correspondence:**

Name: Kathrin Harre

E-Mail: kathrin.harre@htw-dresden.de

Address: University of Applied Sciences Dresden, Friedrich-List-Platz 1, 01069 Dresden, Germany

**Supplementary Information**

## **Supplementary Information SI 1:** Properties of Polymer Filaments

| Polymer | Name | Manufacturer | Diameter ± Deviation in mm | Recommended Nozzle Temper­ature in °C | Speciality/ Additive |
| --- | --- | --- | --- | --- | --- |
| PLA | PLA+ weiß | eSUN | 1.75 ± 0.03 | 210 - 230 | Tough Material |
| PLA | Luminous PLA glow green | eSUN | 1.75 ± 0.03 | 190 - 230 | Fluorescent |
| PCL | Facilan PCL100 | 3D4Makers | 1.75 ± n. s. | 190 - 170 |  |
| PMMA | PMMA transparent | Material4Print | 1.75 ± 0.02 | 240 - 270 |  |
| PA6/6.6 | PA6/66 (Nylon) | Flashforge | 1.75 ± n. s. | 220 - 260 | Polymer Blend |
| LDPE | CE20_LDPE-st_cl (Lupolen 2420K) | Self-Extruded, (Granulate by LyondellBasell) | 1.75 ± 0.03 | n. s. |  |

## **Supplementary Information SI 2:** Parameters for manufacturing of LDPE Filament on The Collin Teachline (CE20 Extruder + Collin Water Bath WB850 + Collin Filament-Rewinder BAW130)

| Granulate | Lupolen 2420 K (Manufacturer: LyondellBasell) |
| --- | --- |
| Temperature Extruder  Zone 1 (Inlet):  Zone 2:  Zone 3:  Zone 4:  Zone 5 (Nozzle): | 35  170  180  185  190 |
| Nozzle Opening Diameter in mm | 3 |
| Filament Exit Angle in ° | 45 |
| Speed of Extruder Screw in U/min | 28 |
| Pressure on the nozzle in bar | 14 |
| temperature water bath in °C | 60 |
| Path length of Filament through water bath in m | 1,2 |
| Take-Off Speed in m/min | 5,55 |
| Winding Torque in Nm | 0,55 |

## **Supplementary Information SI 3:** Results of Self-Extruded LDPE-Filament

| **Position** | **Diameter 1 in mm** | **Diameter 2 in mm** | **Ovality in %** |
| --- | --- | --- | --- |
| 1 | 1,75 | 1,71 | 2,29 |
| 2 | 1,75 | 1,73 | 1,15 |
| 3 | 1,71 | 1,75 | 2,29 |
| 4 | 1,74 | 1,80 | 3,44 |
| 5 | 1,78 | 1,73 | 2,86 |
| 6 | 1,74 | 1,77 | 1,72 |
| 7 | 1,72 | 1,75 | 1,72 |
| 8 | 1,72 | 1,72 | 0,00 |
| 9 | 1,78 | 1,78 | 0,00 |
| 10 | 1,76 | 1,73 | 1,72 |
| 11 | 1,75 | 1,77 | 1,15 |
| 12 | 1,77 | 1,71 | 3,44 |
| 13 | 1,72 | 1,73 | 0,57 |
| 14 | 1,74 | 1,78 | 2,29 |
| **Average (± standard deviation)** | **1,75 ± 0,03** | | **1,76** |

## **Supplementary Information SI 4:** DSC-Measurement of LDPE-Self-Extruded Filament


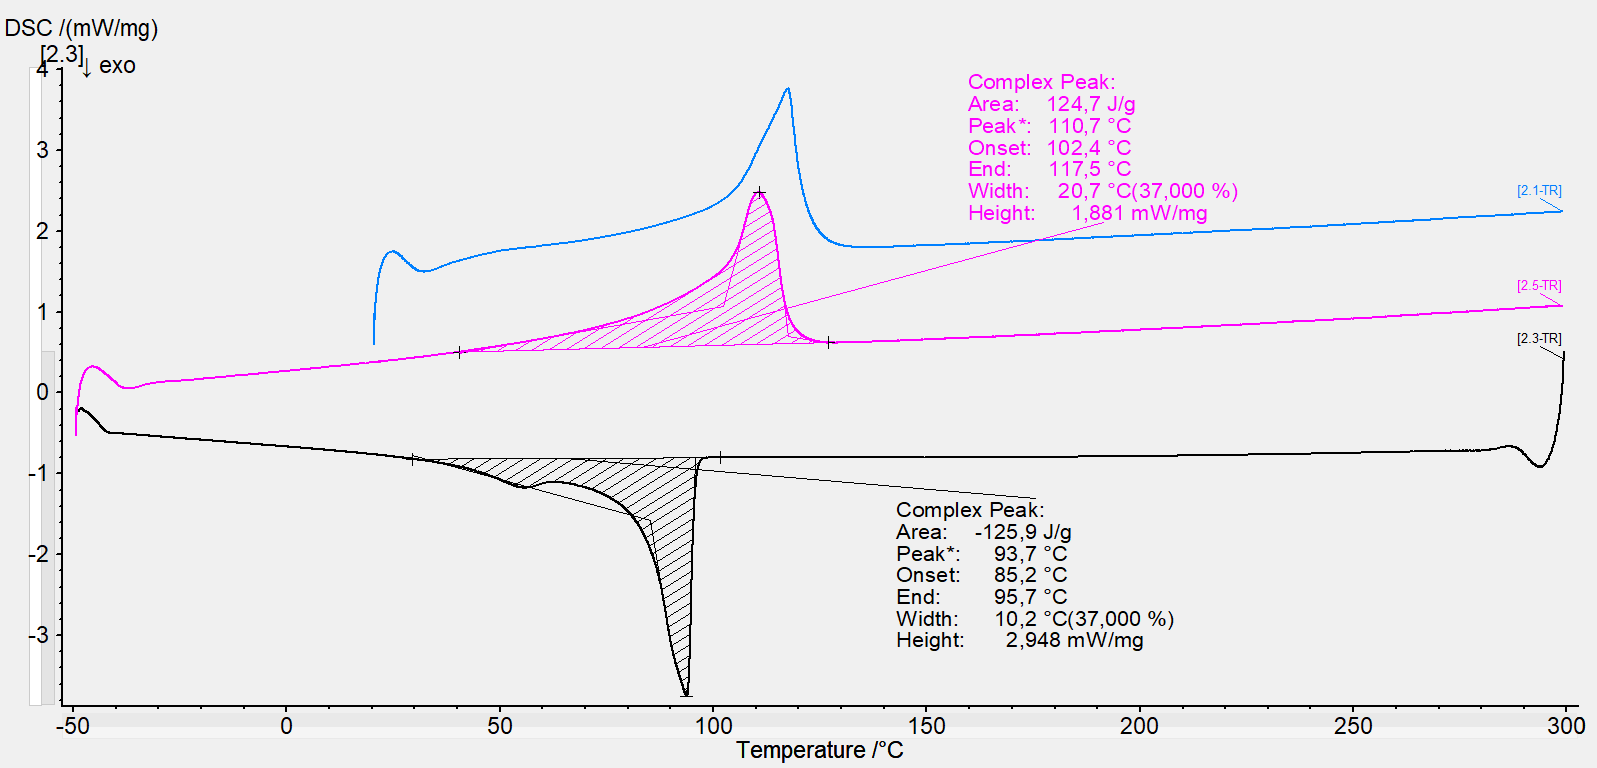


## **Supplementary Information SI 5:** DTA-TGA Measurement of LDPE-Self-Extruded Filament


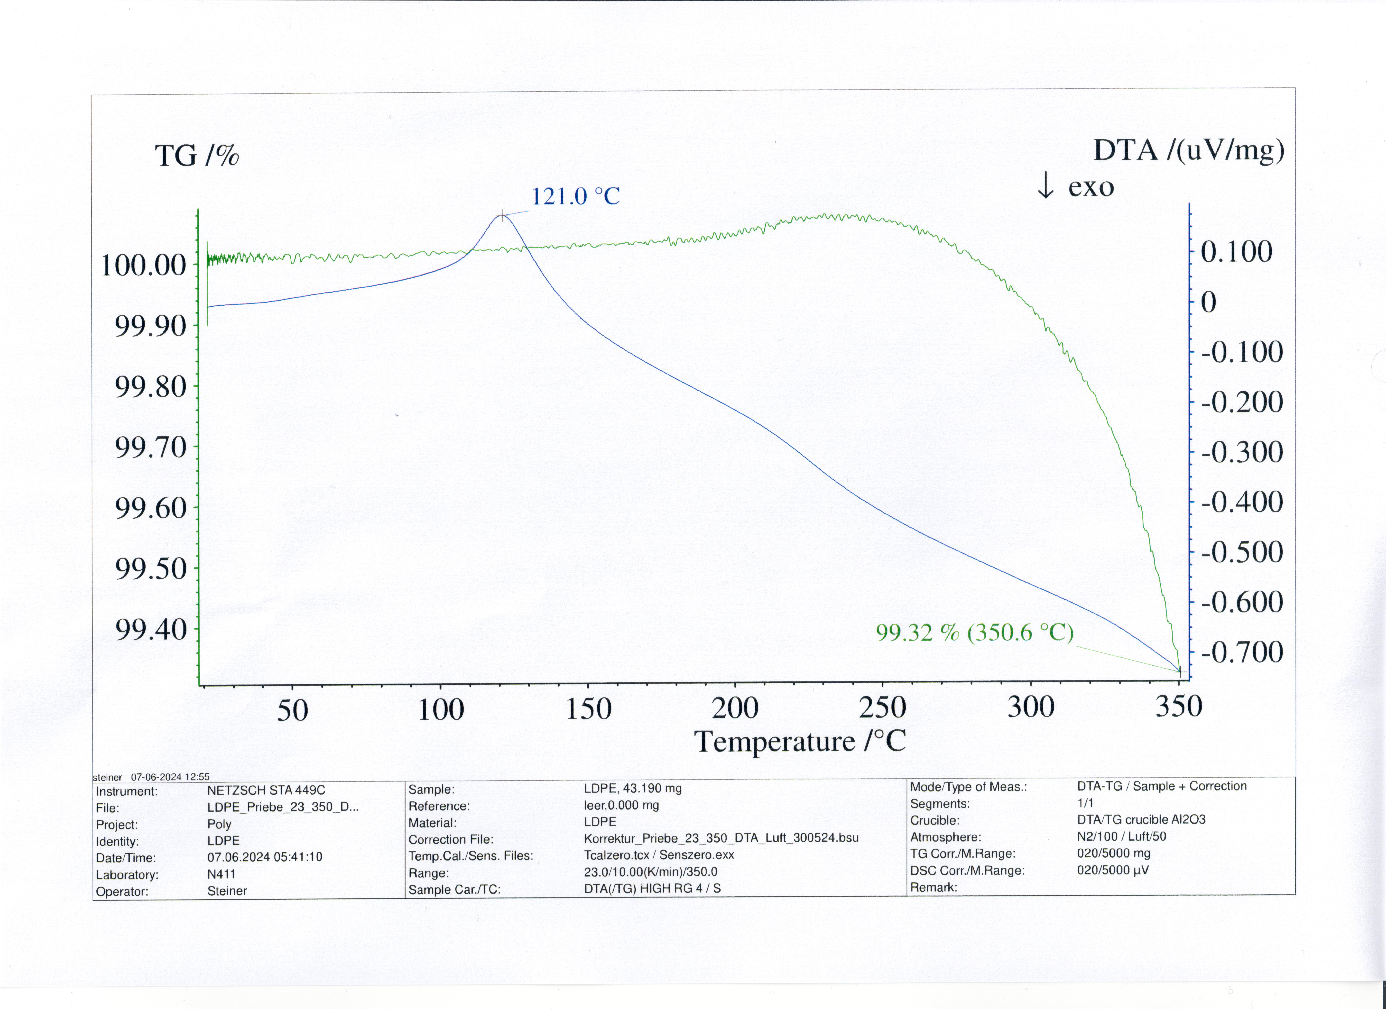


## **Supplementary Information SI 6:** DTA-TGA Measurement of PA Filament from the Manufacturer Flashforge


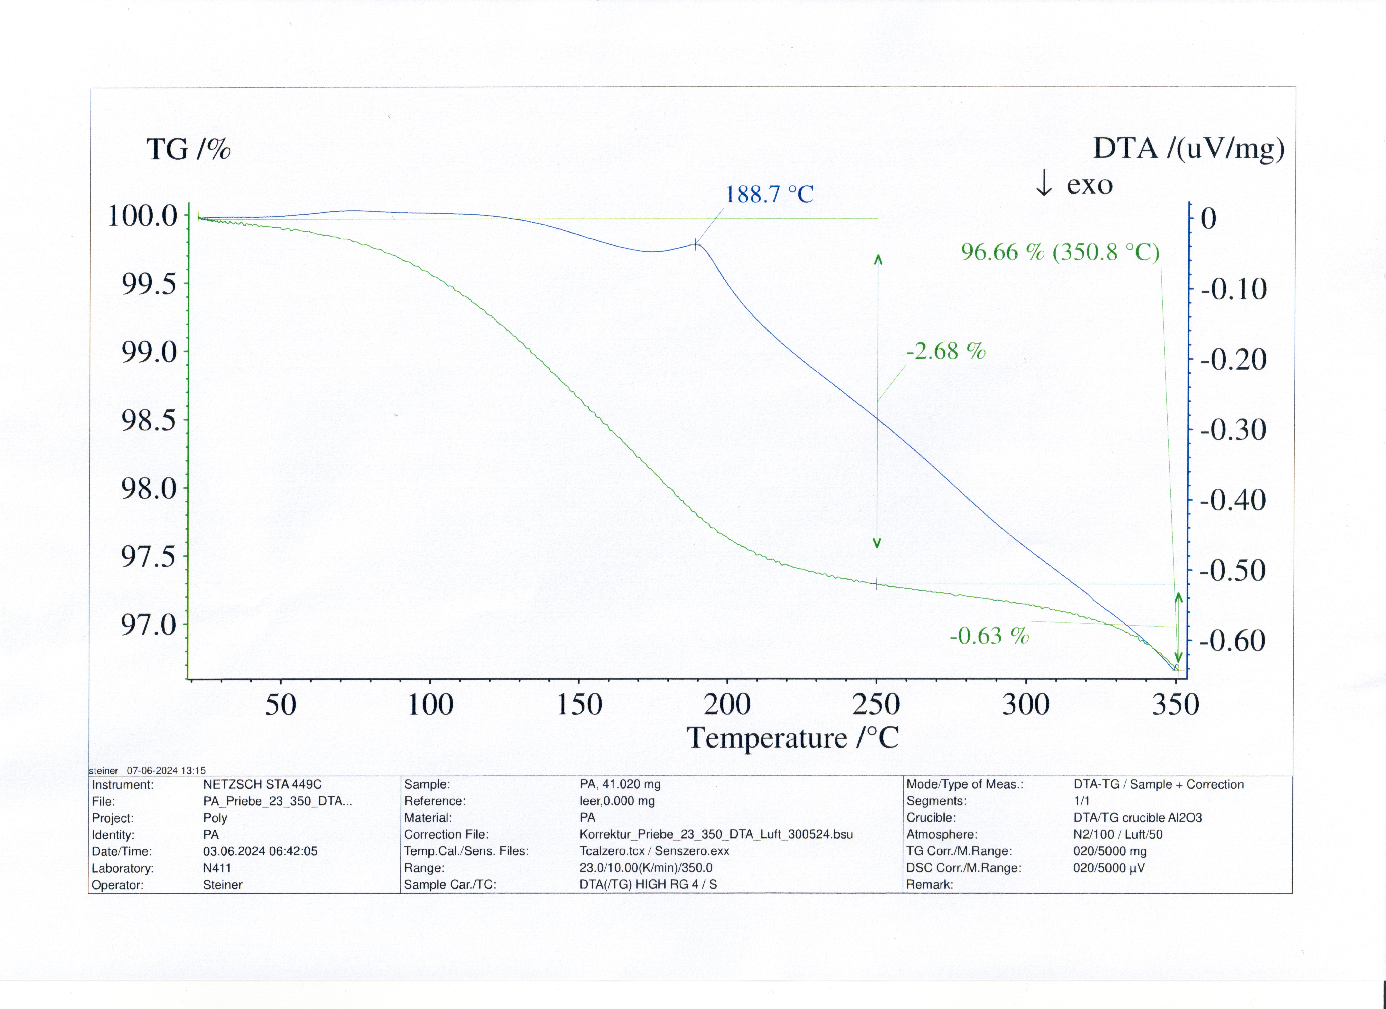


**Supplementary Information SI 7:** Picture of the Shape of Additive Manufactured Particles from the Side


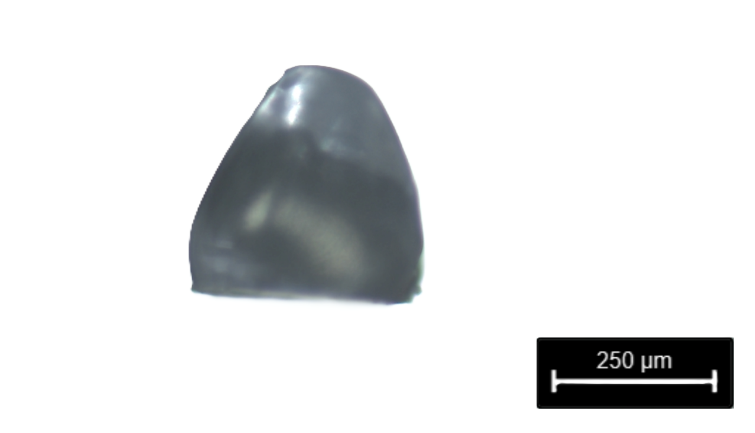

Supplement: Supplementary file 1 [file b06c2f996f3865b830f3117f.docx]
